# Supplementary material for: Nb2O5 Microcolumns for Ethanol Sensing
Source: MDPI journal article supplement (doi:10.3390/s24061851), 2024-03-14
Supplement: s1 [file s1]

## Nb<sub>2</sub>O<sub>5</sub> MICROCOLUMNS FOR ETHANOL SENSING

Gayan C.W. Kumarage <sup>1,2</sup>, Shasika A. Panamaldeniya <sup>3,4</sup>, Valentin A. Maraloiu <sup>5</sup>, Buddhika S. Dassanayake <sup>4</sup>, Nanda Gunawardhana <sup>6</sup>, and Elisabetta Comini <sup>1,\*</sup>

<sup>1</sup> SENSOR Lab, Department of Information Engineering, University of Brescia, Via Valotti 9, 25133 Brescia, Italy; g.wadumasthree@unibs.it, elisabetta.comini@unibs.it

<sup>2</sup> Department of Physics and Electronics, Faculty of Science, University of Kelaniya, Dalugama, 11600, Kelaniya, Sri Lanka; ckumarage@kln.ac.lk

<sup>3</sup> Postgraduate Institute of Science, University of Peradeniya, Peradeniya 20400, Sri Lanka

<sup>4</sup> Department of Physics, Faculty of Science, University of Peradeniya, Peradeniya 20400, Sri Lanka

<sup>5</sup> Laboratory of Atomic Structures and Defects in Advanced Materials, National Institute of Materials Physics, Atomistilor str. 405 A, Bucharest-Magurele, Romania; maraloiu@infim.ro

<sup>6</sup> Research and International Affairs, Sri Lanka Technological Campus, Padukka, 10500, Sri Lanka

\* Correspondence: elisabetta.comini@unibs.it

### Supplementary information

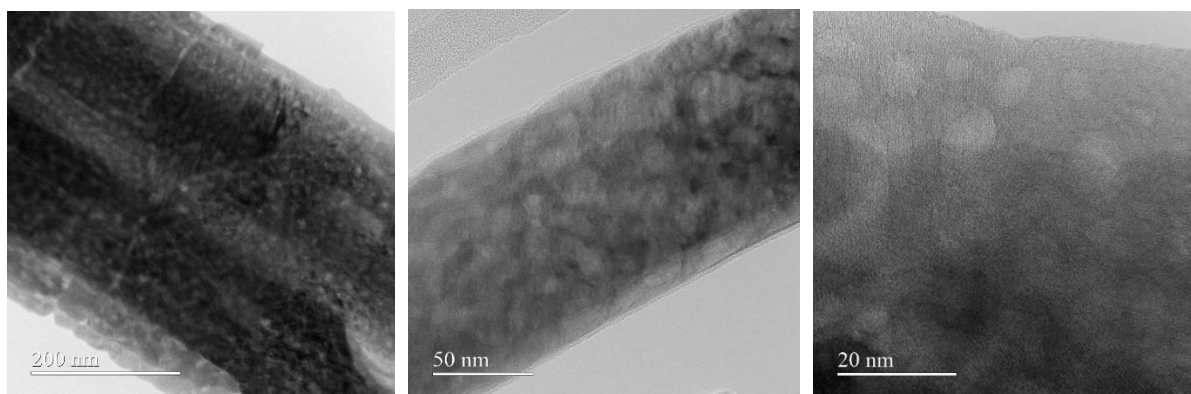

**Figure S1.** Magnified TEM images of Figure 2 (d).

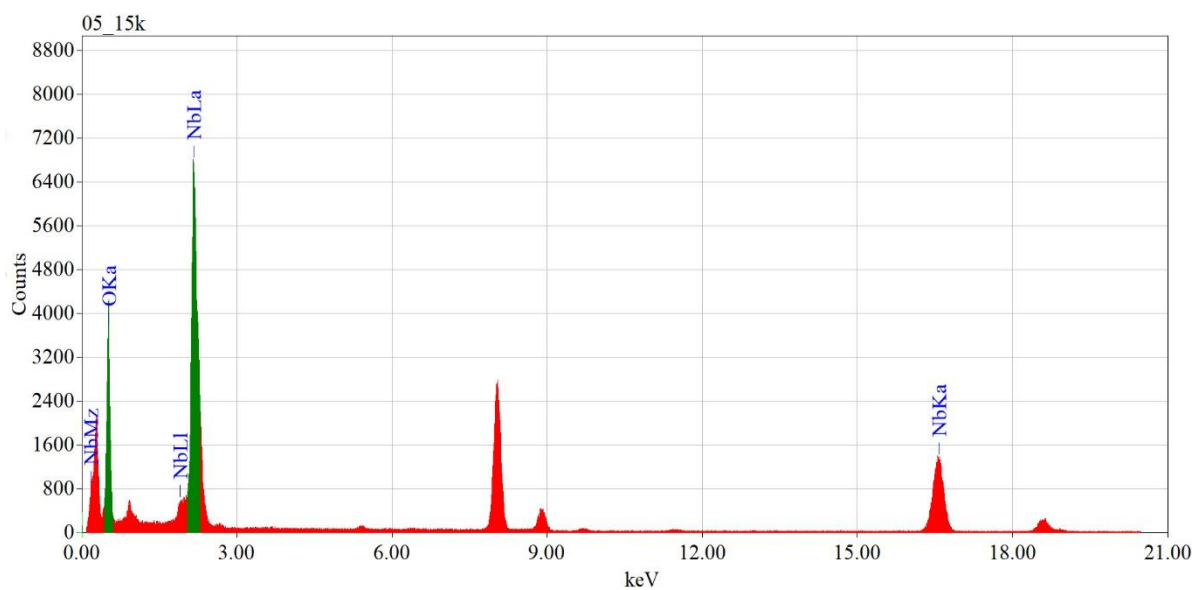

**Figure S2.** EDX spectrum of  $\text{Nb}_2\text{O}_5$  microcolumns confirming the presence of Nb and O.

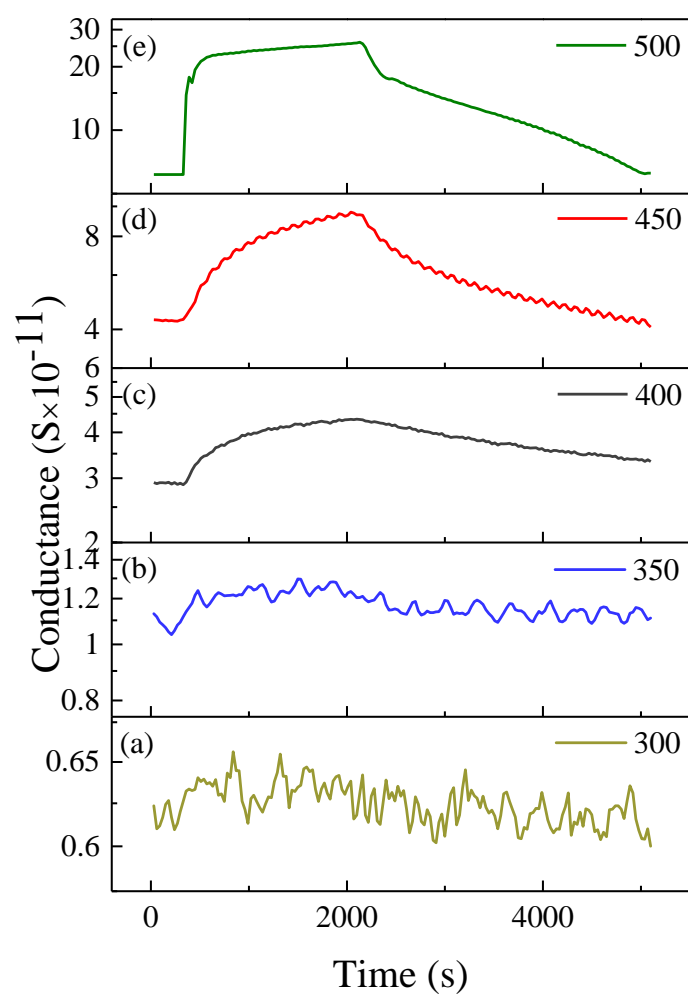

**Figure S3.**  $\text{Nb}_2\text{O}_5$  microcolumns sensor response to 10 ppm ethanol at different operating temperatures (300-500 °C).

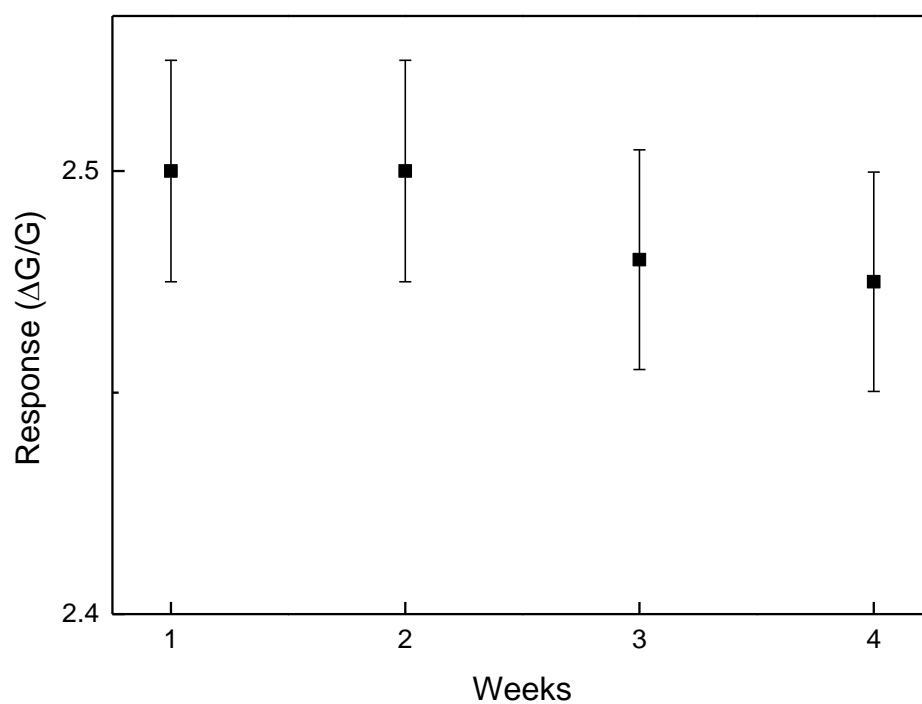

**Figure S4.** Long term stability of the Nb<sub>2</sub>O<sub>5</sub> microcolumns sensor response to 10 ppm ethanol at 500 °C.

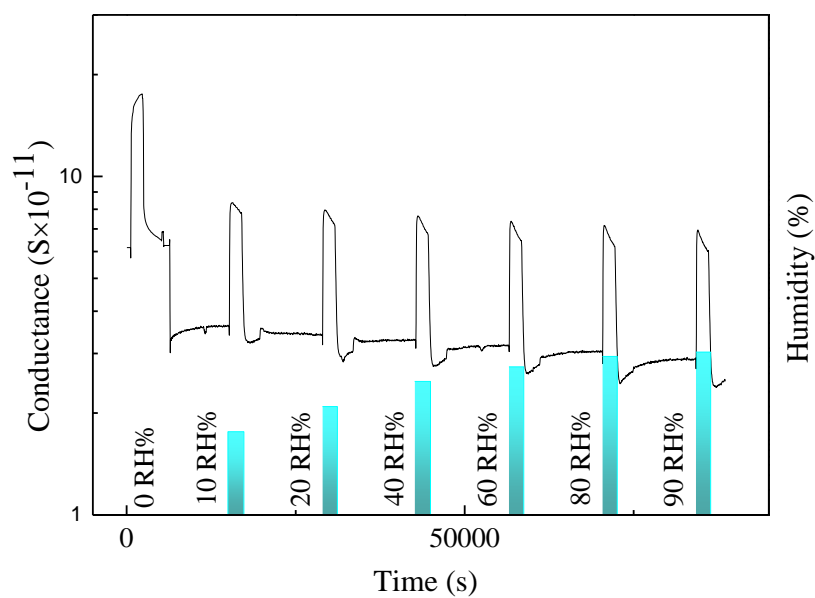

**Figure S5.** Nb<sub>2</sub>O<sub>5</sub> microcolumns sensor dynamic response to 10 ppm ethanol at different humidity levels when operating at optimum working temperatures (500 °C).
